# Supplementary material
Source: PubMed Central journal article supplement (PMC7547000)
Supplement: mmc1.pdf [file mmc1.pdf]

## Supplementary information

### 1. Description of the model

The quarantine-isolation policy of Israel was analyzed using the SEQJR model (Gumel et al., 2004; Koonprasert et al., 2013; Siriprapaiwan et al., 2018). This is a deterministic compartmental model, which was originally developed to analyze the transmission dynamics and control of the SARS epidemics in Toronto, Hong Kong, Singapore and Beijing. The model consists of 7 equations, where each equation is dedicated to a class. The classes are: S – susceptible (Eq. 1), E – exposed or pre-symptomatic (Eq. 2), Q – pre-symptomatic in quarantine (Eq. 3), I – symptomatic and infectious (Eq. 4), J – symptomatic in isolation (Eq. 5), R – recovered (Eq. 6) and D – deceased (Eq. 7).

$$\frac{dS}{dt} = \pi - \beta \frac{S(t)}{N} [I(t) + \varepsilon_E E(t) + \varepsilon_Q Q(t) + \varepsilon_J J(t)] - \mu S(t) \quad (1)$$

$$\frac{dE}{dt} = p + \beta \frac{S(t)}{N} [I(t) + \varepsilon_E E(t) + \varepsilon_Q Q(t) + \varepsilon_J J(t)] - (\gamma_1 + \kappa_1 + \mu) E(t) \quad (2)$$

$$\frac{dQ}{dt} = \gamma_1 E(t) - (\kappa_2 + \mu) Q(t) \quad (3)$$

$$\frac{dI}{dt} = \kappa_1 E(t) - (\gamma_2 + d_1 + \sigma_1 + \mu) I(t) \quad (4)$$

$$\frac{dJ}{dt} = \gamma_2 I(t) + \kappa_2 Q(t) - (\sigma_2 + d_2 + \mu) J(t) \quad (5)$$

$$\frac{dR}{dt} = \sigma_1 I(t) + \sigma_2 J(t) - \mu R(t) \quad (6)$$

$$\frac{dD}{dt} = d_1 I(t) + d_2 J(t) \quad (7)$$

Where, the model's parameters are as follows:

- $\beta$  - Effective contact rate ( $S \rightarrow E$ )
- $\kappa_1$  - Rate of development of clinical symptoms for the exposed-not-quarantined class ( $E \rightarrow I$ )
- $\kappa_2$  - Rate of development of clinical symptoms for the quarantined-exposed class ( $Q \rightarrow J$ )
- $\gamma_1$  - Rate of entry into quarantine from the exposed class ( $E \rightarrow Q$ )
- $\gamma_2$  - Rate of entry into isolation from the symptomatic-not isolated class ( $I \rightarrow J$ )
- $\sigma_1$  - Recovery rate from the infectious-not-isolated class ( $I \rightarrow R$ )
- $\sigma_2$  - Recovery rate from the infectious-in-isolation class ( $J \rightarrow R$ )
- $d_1$  - Mortality rate from the infectious-not-isolated class ( $I \rightarrow D$ )
- $d_2$  - Mortality rate from the infectious-in-isolation class ( $J \rightarrow R$ )
- $\mu$  - natural mortality daily ratio
- $\pi$  - daily net population growth
- $p$  - daily number of infected individuals arriving from abroad into the population
- $N$  - total size of the population
- $\epsilon_E$  - modification factor for the infectivity of the exposed class
- $\epsilon_Q$  - modification factor for the infectivity of the exposed-in-quarantine class
- $\epsilon_J$  - modification factor for the infectivity of the infectious-in-isolation class

$R_0$ , the basic reproduction rate, which is the expected number of secondary infections produced by a single index case, is defined in the SEQIJR model (equations (1)-(8)) when no control measures are in place, i.e.,  $\gamma_1 = \gamma_2 = 0$ :

$$R_0 = \beta \left[ \frac{\varepsilon_E}{\kappa_1 + \mu} + \frac{\kappa_1}{(\kappa_1 + \mu)(d_1 + \sigma_1 + \mu)} \right] \quad (8)$$

Generally, when control measures are implemented,  $R_0$  becomes a theoretical concept, while the effective, or “observed” reproduction number is smaller (Maier and Brockman, 2020). In the case of the SEQIJR model, when the quarantine-isolation policy is fully implemented,  $R_e$ , the effective reproduction number is calculated using the following equation:

$$R_e = \beta \left[ \frac{\varepsilon_E}{D_1} + \frac{\kappa_1}{D_1 D_2} + \frac{\varepsilon_Q \gamma_1}{D_1 D_4} + \frac{\varepsilon_J \kappa_1 \gamma_2}{D_1 D_2 D_3} + \frac{\varepsilon_J \gamma_1 \kappa_2}{D_1 D_3 D_4} \right] \quad (9)$$

where  $D_1 = \gamma_1 + \kappa_1 + \mu$ ,  $D_2 = \gamma_2 + d_1 + \sigma_1 + \mu$ ,  $D_3 = \sigma_2 + d_2 + \mu$ ,  $D_4 = \mu + \gamma_2$

The value of  $\beta$  was determined by using its definition which is  $\beta = c \cdot P$  where  $c$  is the number of contacts an individual makes per unit of time and  $P$  is the probability that a contact with a susceptible individual results in transmission (Martcheva, 2015). The number of contacts per day,  $c$ , was taken as 19.77. This number is the daily average number of contacts reported for people in Italy during a survey that was conducted in eight European countries (Mossong et al., 2008). This number from Italy was chosen as representative to the contact patterns of people in Israel, as it was found that a model describing the transmission dynamics of varicella zoster virus (VZV) resulted the best fit to serological data from Israel when the

contact characteristics of Italy were used (Santermans et al., 2015). The probability,  $P$ , was taken as 3.3% (Luo et al., 2020). These lead to  $\beta$  of 0.6524.

The values of mortality and recovery rates were determined using the following formulae:

$$\sigma = \frac{(1 - \delta)}{\tau} \quad (10)$$

$$d = \frac{\delta}{\tau} \quad (11)$$

Where  $\delta$  is the confirmed case fatality rate and  $\tau$  is the expected time until recovery or death. The COVID-19 case fatality rate is estimated between 5.3%-8.4% (Jung et al., 2020). In this study,  $\delta$  was taken as the lower estimated value of 5.3%.  $\tau_1$  and  $\tau_2$  were taken as 14.5 days and 8.6 days accordingly, with regard to the mean time from symptoms' onset to death and the mean time from hospital admission to death (Linton et al., 2020).

It is plausible to assume that the length of the incubation period is similar, whether or not the exposed person is in quarantine. Therefore, it is possible to define  $\gamma_1$  and  $\kappa_2$  as a function of  $\kappa_1$ :

$$(\kappa_1)^{-1} = (\gamma_1)^{-1} + (\kappa_2)^{-1} \quad (12)$$

$$(\gamma_1)^{-1} = \phi \cdot (\kappa_1)^{-1} \quad (13)$$

$$(\kappa_2)^{-1} = (1 - \phi) \cdot (\kappa_1)^{-1} \quad (14)$$

Where,  $\phi$  is the ratio dividing the incubation time to the period before and in quarantine. In this study,  $\phi$  was taken as 0.2 (scenario 1) and 0.8 (scenario 2, beginning on 13<sup>th</sup> March 2020).

The daily number of infected individuals entering undetected into the population,  $p$ , was based on the analysis of epidemiological investigations reports that was conducted in this study. The parameter  $p$  was set to 6.3 people per day, because

during the 30 days period from 21<sup>st</sup> February 2020 to 21<sup>st</sup> March 2020 a total of 189 of the investigations reports involved imported cases (infected travelers arriving from abroad).

The model parameters' values are as follows:

| Parameter    | Value                                                                            | Reference                                 | Notes                                                                                                                                                         |
|--------------|----------------------------------------------------------------------------------|-------------------------------------------|---------------------------------------------------------------------------------------------------------------------------------------------------------------|
| $\beta$      | $0.6524 \text{ day}^{-1}$                                                        | Santermans et al., 2015; Luo et al., 2020 | See explanation in the text.                                                                                                                                  |
| $\kappa_1$   | $(5.6 \text{ days})^{-1}$                                                        | Linton et al., 2020                       | Mean incubation time including Wuhan residents                                                                                                                |
| $\kappa_2$   | Scenario 1: $(4.48 \text{ days})^{-1}$<br>Scenario 2: $(1.12 \text{ days})^{-1}$ | Equations (12)-(14)                       | See explanation in the text.                                                                                                                                  |
| $\gamma_1$   | Scenario 1: $(1.12 \text{ days})^{-1}$<br>Scenario 2: $(4.48 \text{ days})^{-1}$ |                                           |                                                                                                                                                               |
| $\gamma_2$   | $(4.3 \text{ days})^{-1}$                                                        | Linton et al., 2020                       | Pooled mean time from onset to hospital (for either hospitalization that ended with dead or recovery)                                                         |
| $\sigma_1$   | $0.0653 \text{ day}^{-1}$                                                        |                                           | See explanation in the text.                                                                                                                                  |
| $\sigma_2$   | $0.1101 \text{ day}^{-1}$                                                        |                                           | See explanation in the text.                                                                                                                                  |
| $d_1$        | $0.0037 \text{ day}^{-1}$                                                        |                                           | See explanation in the text.                                                                                                                                  |
| $d_2$        | $0.0062 \text{ day}^{-1}$                                                        |                                           | See explanation in the text.                                                                                                                                  |
| $p$          | $6.3 \text{ day}^{-1}$                                                           |                                           | See explanation in the text.                                                                                                                                  |
| $\pi$        | 465 people/day                                                                   | Central Bureau of Statistics (2020)       |                                                                                                                                                               |
| $\mu$        | $1.425 \times 10^{-5}$                                                           | Central Bureau of Statistics (2020)       |                                                                                                                                                               |
| $\epsilon_E$ | 0.48                                                                             | Ganyani et al., 2020                      | The proportion of pre-symptomatic transmission in Singapore                                                                                                   |
| $\epsilon_Q$ | Scenario 1: 0<br>Scenario 2: 0.48                                                |                                           |                                                                                                                                                               |
| $\epsilon_J$ | Scenario 1: 0<br>Scenario 2: 0.2                                                 | Gumel et al., 2004                        | During the SARS epidemic $\epsilon_J$ was estimated as 0.2 (Singapore), 0.36 (Canada) and 0.82 (China). For scenario 2, the lower of these values was chosen. |

TABLE. 1. Parameter values for the SEQIJR model

The model was programmed in R (R Core Team, 2019) using the deSolve package (Soetaert et al., 2010). The calculation of  $R_0$  based on the confirmed cases data was performed using the package R0 (Boelle and Obadia, 2015).

## **2. Daily number of tests, new cases and positive results**

It may be suggested that the abrupt change that occurred around Purim is really the result of the rise in the daily number of PCR tests performed. This claim may be supported by the fact that during the first three months of the COVID-19 outbreak in Israel, the daily number of tests exhibited similar trend as the daily number of new cases (Fig S2). However, these two numbers parted during the fourth week, where the rate of change in the daily new cases was much greater than the rate of change in the number of tests. Moreover, while at first the daily percent of positive tests was 2-3%, around Purim, this percent rose to 5-6% and then, near the end of March even rose over 8% (Fig S2). Therefore, while some of the new cases around Purim may be attributed to the rise in tests, it is far from fully explaining the deductions given in this study.

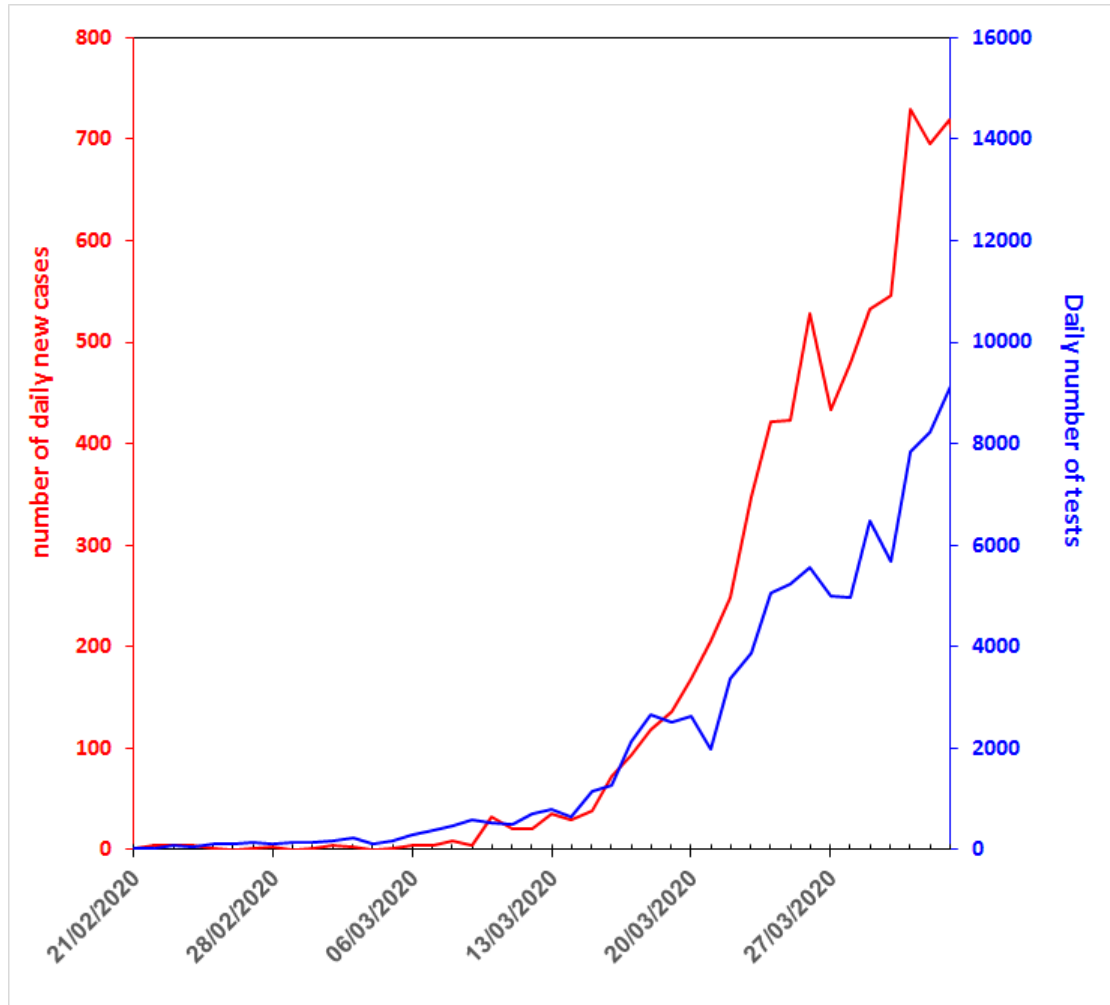

FIG. S1. Daily number of tests (blue) and daily number of new cases (red) during the first 6 weeks of the COVID-19 outbreak in Israel



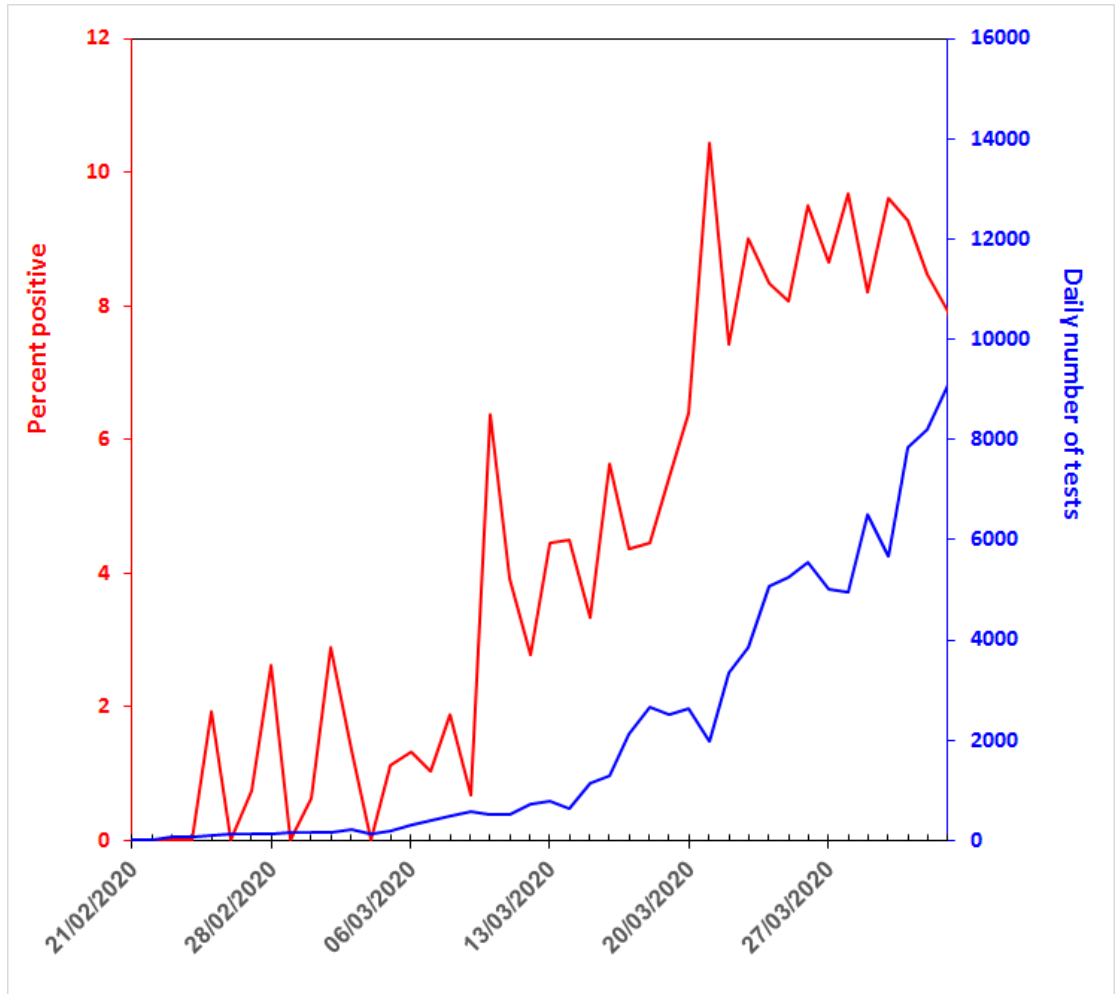

FIG. S2. Daily number of tests (blue) and daily percent positive test (red) daily during the first 6 weeks of the COVID-19 outbreak in Israel

### 3. Examples of epidemiological investigation reports

The following were translated from Hebrew by the authors, from the original epidemiological investigation reports released by the Israeli Ministry of Health (Corona – Ministry of Health, 2020).

Notification to the public - corona patient - case number 190  
>>>>>>>>  
Sunday, 15.3, 15:00

The patient is male in his thirties from central Israel, who was in contact with a known patient.  
The close contacts of the patient were already located and were individually debriefed.

Train between 8.3 to 11.3:  
To: On 7:05 from Savidor-center station in Tel-Aviv to Yitzhak Navon in Jerusalem with an interchange in Hagana station in Tel Aviv on 07:21.  
Fro: On 18:03 from Yitzhak Navon in Jerusalem to Savidor-center station in Tel-Aviv with an interchange in Hagana station in Tel Aviv on 18:40.  
12.3: Train on 07:05 from Savidor-center station in Tel-Aviv to Yitzhak Navon in Jerusalem with an interchange in Hagana station in Tel Aviv on 07:21.  
Fro: On 11:03 from Yitzhak Navon in Jerusalem with an interchange in Hagana station in Tel Aviv on 11:47.  
8.3: Hub Cross Namal Fit Gym on Tel-Aviv port 19, between 20:00-21:00  
9.3: Purim party in Sura Mare club, 24 Saadia Gaon St., Tel-Aviv from 23:00 to 00:30 the next day.

Every person that traveled in these trains or visited the locations noted hereby during the detailed time periods is requested to get into home quarantine by the warrant of the Ministry of Health and to report it on the ministry of health website <http://bit.ly/MOH-Corona> or the Health Ministry's call center \*5400  
Or the HMOs' call centers:  
Clalit \*2700  
Maccabi \*3555  
Meuhedet \*3833  
Leumit \*507

For official, validated and timely information:  
\* The Health Ministry website:  
<http://bit.ly/MOH-Corona>  
\* Telegram:  
<https://t.me/MOHreport>  
\* CoronApp application

\*  
Eyal Basson  
The Israeli Health Ministry spokesman

Notification to the public - corona patient - case number 198

>>>>>>>>

Sunday, 15.3, 15:00

Male in his twenties from central Israel, contact of tourists from USA.

7.3 22:00-23:00 Chateau Shual wine bar, Malkhi Yisrael St 19, Tel-Aviv

9.3 23:00-03:00 Purim party in "Sura Mare" club, 24 Saadia Gaon St., Tel-Aviv.

10.3: 14:00-19:00 Purim party of the Interdisciplinary Center Herzliya college, at "Kokhav HaYam" banquet hall in Caesaria, Kibbutz Sdot-Yam.

10.3: 22:00-23:00 party on "Reading 11", in Hangar 11, Tel-Aviv port.

Other contacts of this patient were notified individually.

Every person that visited these locations during the detailed time periods is requested to get into home quarantine by the warrant of the Ministry of Health and to report it on the ministry of health website <http://bit.ly/MOH-Corona> or the Health Ministry's call center \*5400.

Or the HMOs' call centers:

Clalit \*2700

Maccabi \*3555

Meuhede \*3833

Leumit \*507

For official, validated and timely information:

\* The Health Ministry website:

<http://bit.ly/MOH-Corona>

\* Telegram:

<https://t.me/MOHreport>

\* CoronApp application

\*

Eyal Basson

The Israeli Health Ministry spokesman

Notification to the public - corona patient - case number 252

>>>>>>>>

Tuesday, 17.3, 7:00

The patient is his twenties, from central Israel.  
A contact of a confirmed patient.

8.3: 14:00-16:00 "Gan Sipur" café, 7 Hatzionut st., Hod HaSharon.  
00:30-03:00 (9.3) "Kuli Alma" club, 10 Mikve Israel St., Tel-Aviv

9.3: Between 15:30-16:30 Nona Café, 44 Ibn Gabirol st. Tel-Aviv  
21:00-02:00 participation in a celebration in "Sheva" banquet hall,  
21 HaTsfira St., Tel-Aviv

10.3: 15:00-18:30 "Kokhav HaYam" banquet hall in Kibbutz Sdot-Yam -  
A Purim party of the Interdisciplinary Center Herzliya college.  
19:30-20:30 "Tabun", 90 Ramatayim rd., Hod HaSharon.

11.3: 00:30-04:30 party on "Reading 11", in Hangar 11, 1 Yordei  
HaSira St., Tel-Aviv.

Family members, acquaintances and colleagues were personally  
notified.

Entered quarantine on 13.3.

Every person that visited these locations during the detailed days  
and times is requested to get into home quarantine by the warrant  
of the Ministry of Health and to report it on the ministry of  
health website <http://bit.ly/MOH-Corona> or the Health Ministry's  
call center \*5400.

Or the HMOs' call centers:

Clalit \*2700

Maccabi \*3555

Meuhede \*3833

Leumit \*507

For official, validated and timely information:

\* The Health Ministry website:

<http://bit.ly/MOH-Corona>

\* Telegram:

<https://t.me/MOHreport>

\* CoronApp application

\*

Eyal Basson

The Israeli Health Ministry spokesman

## References

1. Boelle P-Y, Obadia T.  $R_0$ : Estimation of  $R_0$  and Real-Time Reproduction Number from Epidemics. R package version 1.2-6. <https://CRAN.R-project.org/package=R0>, 2015.
2. Central Bureau of Statistics. Statistical Abstract of Israel 2019 - No.70. <https://www.cbs.gov.il/en/publications/Pages/2019/Statistical-Abstract-of-Israel-2019-No-70.aspx>, 2020 (accessed 20 Mar 2020)
3. Corona – Ministry of Health, Israel Ministry of Health Telegram channel of news and updates, <https://t.me/s/MOHreport>, 2020 (accessed 12 July 2020).
4. Ganyani T, Kremer C, Chen D, Torneri A, Faes C, Wallinga J, Hens N. Estimating the generation interval for coronavirus disease (COVID-19) based on symptom onset data, March 2020. Euro Surveill 2020;25. <https://doi.org/10.2807/1560-7917.ES.2020.25.17.2000257>
5. Gumel AB, Ruan S, Day T, Watmough J, Brauer F, van den Driessche P, Gabrielson D, Bowman C, Alexander ME, Ardal S, Wu J, Sahai BM. Modelling strategies for controlling SARS outbreaks. Proc Royal Soc B 2004;271:2223-32. <https://doi.org/10.1098/rspb.2004.2800>
6. Jung SM, Akhmetzhanov AR, Hayashi K, Linton NM, Yang Y, Yuan B, Kobayashi T, Kinoshita R, Nishiura H. Real-Time Estimation of the Risk of Death from Novel Coronavirus (COVID-19) Infection: Inference Using Exported Cases. J Clin Med 2020;9:523. <https://doi.org/10.3390/jcm9020523>
7. Koonprasert S, Janreung S, Moore EJ. An analysis of quarantine and isolation in an SEQIJR model. Far East J Math Sci 2013;152-72.
8. Siriprapaiwan S, Moore EJ, Koonprasert S. Generalized reproduction numbers, sensitivity analysis and critical immunity levels of an SEQIJR

- disease model with immunization and varying total population size. *Math Comput Simul* 2018;146:70-89. <https://doi.org/10.1016/j.matcom.2017.10.006>
9. Soetaert K, Petzoldt T, Setzer RW. Solving Differential Equations in R: Package deSolve. *J Stat Softw* 2010;33:1-25. <https://doi.org/10.18637/jss.v033.i09>
10. Linton NM, Kobayashi T, Yang Y, Hayashi K, Akhmetzhanov AR, Jung SM, Yuan B, Kinoshita R, Nishiura H. Incubation Period and Other Epidemiological Characteristics of 2019 Novel Coronavirus Infections with Right Truncation: A Statistical Analysis of Publicly Available Case Data. *J Clin Med* 2020;17. <https://doi.org/10.3390/jcm9020538>
11. Luo L, Liu D, Liao X-l, Wu X-b, Jing Q-l, Zheng J-z, Liu F-h, Yang S-g, Bi B, Li Z-h, Liu J-p, Song W-q, Zhu W, Wang Z-h, Zhang X-r, Chen P-l, Liu H-m, Cheng X, Cai M-c, Huang Q-m, Yang P, Yang X-f, Huang Z-g, Tang J-l, Ma Y, Mao C. Modes of contact and risk of transmission in COVID-19 among close contacts. medRxiv preprint 2020. <https://doi.org/10.1101/2020.03.24.20042606>
12. Maier BF, Brockmann D. Effective containment explains subexponential growth in recent confirmed COVID-19 cases in China. *Science* 2020;368:742-6. <https://doi.org/10.1126/science.abb4557>
13. Martcheva M. An introduction to mathematical epidemiology. New York: Springer; 2015.
14. Mossong J, Hens N, Jit M, Beutels P, Auranen K, Mikolajczyk R, Massari M, Salmaso S, Tomba GS, Wallinga J, Heijne J, Sadkowska-Todys M, Rosinska M, Edmunds WJ. Social Contacts and Mixing Patterns Relevant to the Spread

of Infectious Diseases. PLoS Med 2008;5:0381-91.

<https://doi.org/10.1371/journal.pmed.0050074>

15. R Core Team. R: A language and environment for statistical Computing. R

Foundation for Statistical Computing, Vienna, Austria. [https://www.R-](https://www.R-project.org/)

[project.org/](https://www.R-project.org/), 2019.

16. Santermans E, Goeyvaerts N, Melegaro A, Edmunds WJ, Faes C, Aerts M,

Beutels P, Hens N. The social contact hypothesis under the assumption of

endemic equilibrium: Elucidating the transmission potential of VZV in

Europe. Epidemics 2015;11:14-23.

<https://doi.org/10.1016/j.epidem.2014.12.005>
